# Supplementary material
Source: publisher site journal article supplement (https://www.dovepress.com/article/363035)
Supplement: Supplementary file 1 [file get_supplementary_file.php]

**Table S1**

**Echocardiographic probability of pulmonary hypertension in patients with a suspicion of pulmonary hypertension**

| Peak tricuspid regurgitation velocity (m/s) | Presence of other echo PH signs | Echocardiographic probability of pulmonary hypertension |
| --- | --- | --- |
| ≤2.8 or not measurable | No | Low |
| ≤2.8 or not measurable | Yes | Intermediate |
| 2.9–3.4 | No |
| 2.9–3.4 | Yes | High |
| >3.4 | Not required |

**Table S2**

**The clinical and biochemical parameters between the training and** **validation sets**

|  | Overall(n=527) | Training set (n = 368) | Validation set(n=159) | p |
| --- | --- | --- | --- | --- |
| Age(years) | 73.00 [68.00, 79.00] | 73.00 [68.00, 80.00] | 73.00[66.50, 78.00] | 0.385 |
| sex (n,%) |  |  |  | 0.654 |
| male | 357 (67.7) | 252 (68.5) | 105 (66.0) |  |
| female | 170 (32.3) | 116 (31.5) | 54 (34.0) |  |
| Smoking index(n,%) |  |  |  | 0.613 |
| ≤400 | 371 (70.4) | 262 (71.2) | 109 (68.6) |  |
| >400 | 156 (29.6) | 106 (28.8) | 50 (31.4) |  |
| BMI (n,%) |  |  |  | 0.601 |
| <18.5 | 107 (20.3) | 72 (19.6) | 35 (22.0) |  |
| ≥18.5 | 420 (79.7) | 296 (80.4) | 124 (78.0) |  |
| Duration of the disease (years,n,%) |  |  |  | 0.258 |
| ≤10 | 270 (51.2) | 195 (53.0) | 75 (47.2) |  |
| >10 | 257 (48.8) | 173 (47.0) | 84 (52.8) |  |
| emphysema (n,%) | 372 (70.6) | 257 (69.8) | 115 (72.3) | 0.637 |
| GOLD stage (n,%) |  |  |  | 0.252 |
| I-II | 247 (46.9) | 179 (48.6) | 68 (42.8) |  |
| III-IV | 280 (53.1) | 189 (51.4) | 91 (57.2) |  |
| WBC 109/L 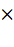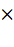 | 7.67 [6.10, 10.27] | 7.60 [6.10, 10.03] | 7.69[6.10, 10.84] | 0.607 |
| Hemoglobin, g/L | 134.00[119.00, 146.00] | 135.00[120.00,147.00] | 131.00[118.00,144.00] | 0.476 |
| RDW-SD(fl） | 45.10[42.30, 48.40] | 45.05 [42.27, 48.23] | 45.20[42.50,48.9] | 0.535 |
| MPV (fl) | 10.00 [9.40, 10.60] | 9.95 [9.38, 10.60] | 10.00[9.40, 10.70] | 0.5 |
| PLT109/L 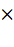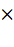 | 220.00 [173.00, 272.50] | 222.00 [176.00,274.50] | 218.00[164.50, 269.50] | 0.439 |
| NLR | 6.10 [3.37, 11.77] | 6.13 [3.41, 11.78] | 5.88 [3.24, 11.63] | 0.904 |
| PaCO2 (n,%) |  |  |  | 0.761 |
| <50mmHg | 229 (43.5) | 162 (44.0) | 67 (42.1) |  |
| ≥50mmHg | 298 (56.5) | 206 (56.0) | 92 (57.9) |  |
| NT.proBNP (n,%) |  |  |  | 0.579 |
| ≤300pg/ml | 210 (39.8) | 150 (40.8) | 60 (37.7) |  |
| >300pg/ml | 317 (60.2) | 218 (59.2) | 99 (62.3) |  |
| ALB(g/L) | 37.90[34.50,41.30] | 37.85 [34.27, 41.32] | 37.90 [34.95, 41.30] | 0.872 |
| PCT (ng/ml) | 0.19 [0.12, 0.34] | 0.20 [0.12, 0.33] | 0.18 [0.12, 0.35] | 0.997 |
| CRP(mg/L) | 13.80 [1.00, 42.27] | 14.10 [1.00, 38.50] | 12.23 [1.00, 46.20] | 0.902 |
| IL-8 (pg/ml) | 8.90 [2.80, 54.50] | 10.30 [3.00, 54.50] | 8.00 [2.55, 54.50] | 0.477 |
| IL-6 (pg/ml) | 14.50 [6.80, 39.05] | 14.40 [7.00, 38.80] | 17.50 [5.95, 41.10] | 0.889 |
| TNF-α(pg/ml) | 1.70 [0.90, 4.40] | 1.70 [0.90, 4.40] | 1.50 [0.90, 4.40] | 0.478 |
| DDimer(ugDDU/ml) | 0.89 [0.60, 1.73] | 0.87 [0.57, 1.65] | 0.91 [0.61, 1.85] | 0.353 |
| UREA (mmol/L) | 5.56 [4.32, 7.23] | 5.64 [4.39, 7.31] | 5.27 [4.23, 6.80] | 0.228 |
| CREA (umol/L) | 62.10 [49.45, 78.35] | 63.45 [50.00, 79.43] | 60.00 [47.65, 75.80] | 0.142 |
| UAC (umol/L) | 278.00 [212.00, 356.50] | 283.00[209.75,363.00] | 272.00[220.50, 325.00] | 0.272 |
| CK(U/L) | 63.00 [44.00, 111.00] | 63.00 [43.00, 111.00] | 62.00 [45.00, 108.00] | 0.857 |
| LDH(U/L) | 175.00 [147.00, 217.00] | 177.00 [149.00, 222.00] | 172.00 [145.50, 199.00] | 0.166 |

Abbreviations: BMI: Body Mass Index, RDW-SD: [red blood cell distribution width-standard deviation](https://pubmed.ncbi.nlm.nih.gov/32274144/),NLR:Neutrophil-to-Lymphocyte ratio, ALB: [albumin](javascript:;), MPV: mean platelet volume, PLT: platelet
